# Supplementary material for: Positive Association Between Serum Level of Glyceraldehyde-Derived Advanced Glycation End Products and Vascular Inflammation Evaluated by [18F]Fluorodeoxyglucose Positron Emission Tomography
Source: PubMed Central journal article supplement — Diabetes Care. 2012 Nov 14;35(12):2618–25. doi: 10.2337/dc12-0087 (PMC3507595; doi:10.2337/dc12-0087), 2012-11-14

SUPPLEMENTARY DATA

**Supplementary Figure 1.** Distribution of serum levels of AGEs in our subjects.

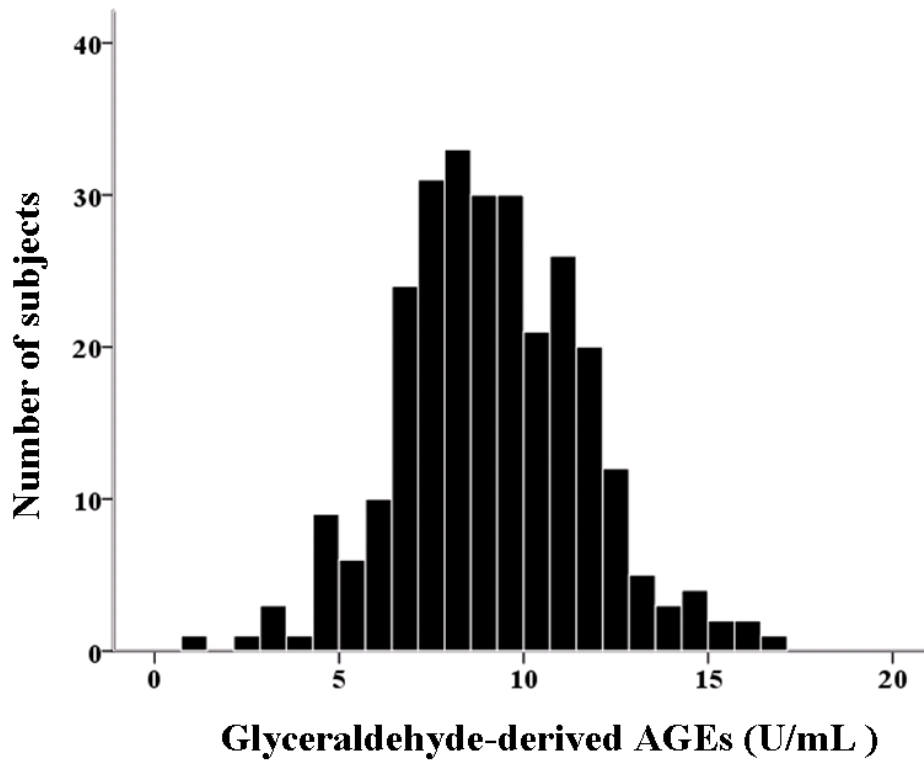

**Supplementary Figure 2.** Correlation of the changes in HbA1c level ( $\Delta$ HbA1c) obtained by OHA treatment with those of TBR value ( $\Delta$ TBR) ( $r=0.17$ ,  $P=0.49$ ) (A) and those of AGE level ( $\Delta$ AGEs) (B) ( $r=0.14$ ,  $P=0.59$ ).

Supplementary Figure 2A

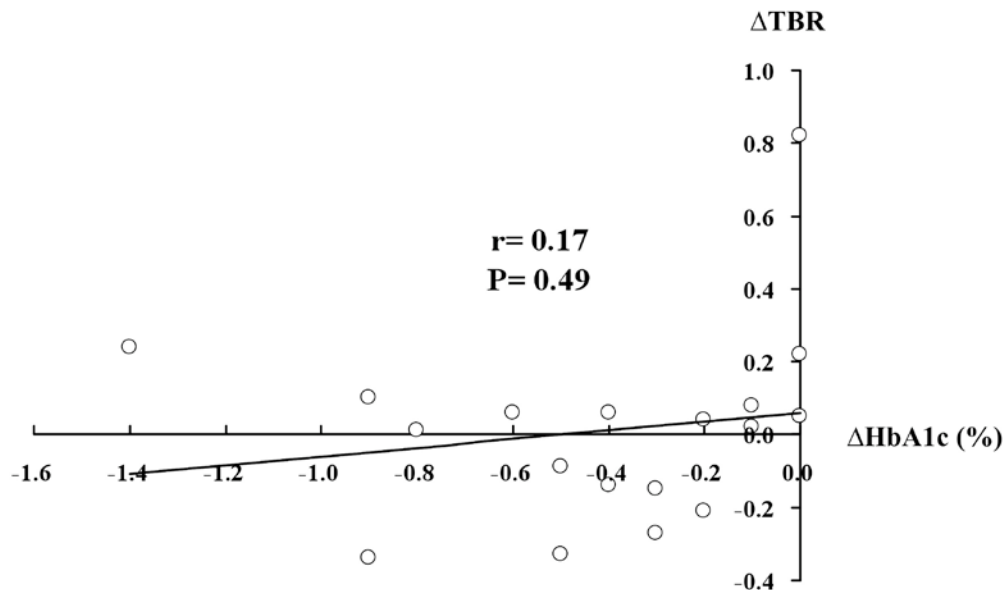

SUPPLEMENTARY DATA

Supplementary Figure 2B

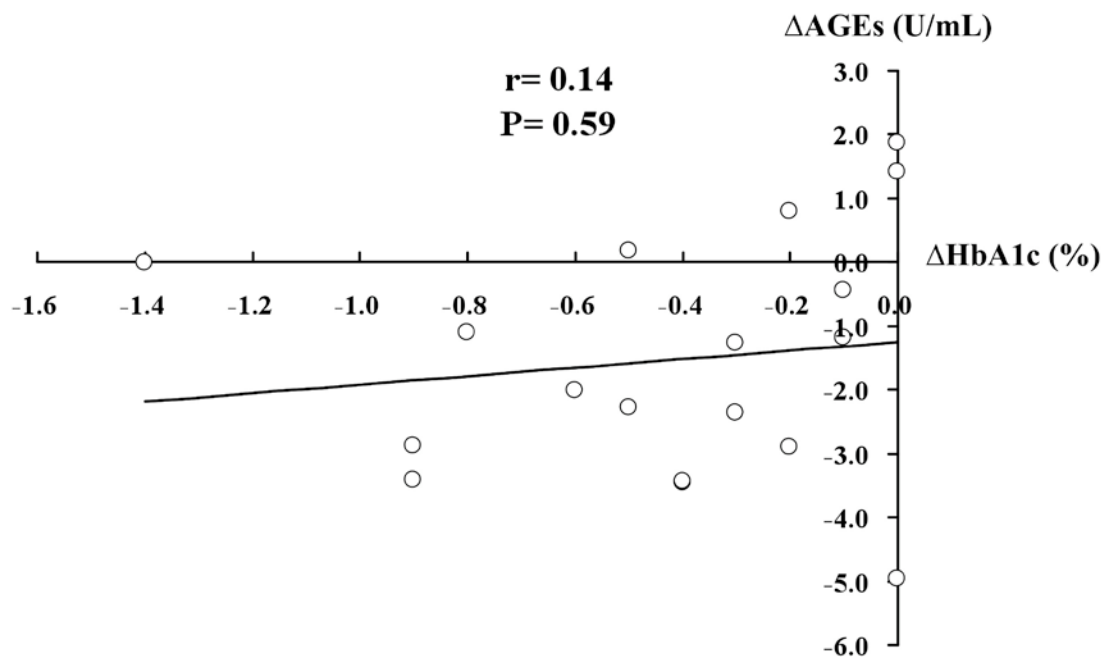

SUPPLEMENTARY DATA

**Supplementary Figure 3.** Immunoreactivity of anti-glyceraldehyde-derived-AGE antibodies with various structurally identified AGEs. Immunoreactivity of anti-glyceraldehyde-derived-AGE antibodies with various structurally identified AGEs such as CML-BSA, carboxyethyllysine (CEL)-BSA, pyrraline-BSA, pentosidine-BSA, argpyrimidine-BSA, 3-deoxyglucosone imidazolone-BSA, glyoxal-lysine dimer (GOLD), methylglyoxal-lysine dimer (MOLD), and glyceraldehyde-derived pyridinium (GLAP) was examined by competitive ELISA as described previously (15). In brief, 50  $\mu$ l of various AGE preparations was added to each glyceraldehyde-derived AGE-BSA-coated well as a competitor for 50  $\mu$ l of anti-glyceraldehyde-derived-AGE antibodies followed by incubation for 2 hours at room temperature. Then, immunoreactivity of the antibodies with various AGE preparations was determined by competitive ELISA. Results are expressed as B/B<sub>0</sub>, calculated as follows: (experimental optical density – background optical density)/(total optical density – background optical density).

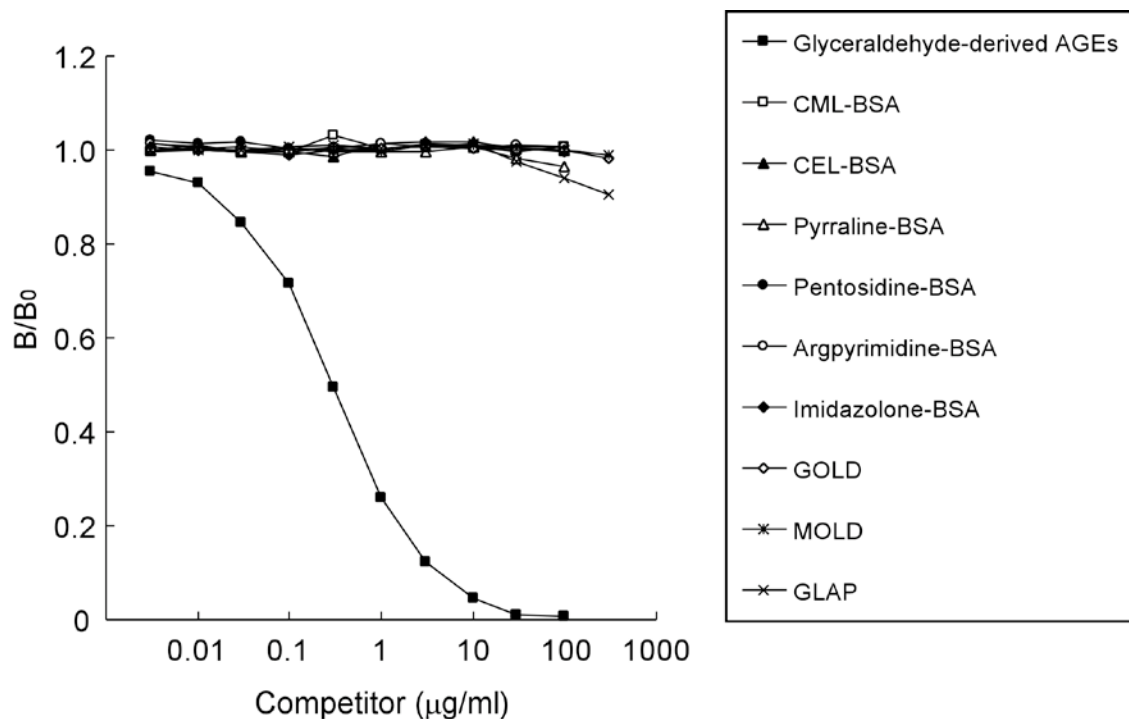

Supplement: supp_dc12-0087v120087_DC120087SupplementaryData.pdf [file supp_dc12-0087v120087_DC120087SupplementaryData.pdf]
